# Supplementary material
Source: ML conference proceedings conference paper supplement (https://openreview.net/forum?id=14ZMESMh5V)
Supplement: supplementary_material [file NeurIPS_2025_DISCO__DISCrete_nOise_for_Conditional_Control_in_Text_to_Image_Diffusion_Models (4).pdf › NeurIPS_2025_DISCO__DISCrete_nOise_for_Conditional_Control_in_Text_to_Image_Diffusion_Models (4).pdf]

---

# Supplementary Material for DISCO: DISCcrete nOise for Conditional Control in Text-to-Image Diffusion Models

---

## 1 Proof

**Theorem 1.** Let  $n \geq 2$  denote the ambient dimension, and let  $\theta = \angle(\boldsymbol{\mu}, \boldsymbol{\epsilon})$  be the angle between the mean vector  $\boldsymbol{\mu}$  and a random vector  $\boldsymbol{\epsilon} \sim \mathcal{N}(\boldsymbol{\mu}, \mathbf{I})$ . Then,  $v = \cos^2 \theta = \left( \frac{\langle \boldsymbol{\mu}, \boldsymbol{\epsilon} \rangle}{\|\boldsymbol{\mu}\| \cdot \|\boldsymbol{\epsilon}\|} \right)^2$  follows the non-central beta distribution:

$$v \sim \text{Beta}(\alpha, \beta; \lambda). \quad (1)$$

where  $\alpha = \frac{1}{2}$ ,  $\beta = \frac{n-1}{2}$ , and  $\lambda = \|\boldsymbol{\mu}\|^2$ . Let  ${}_2F_1(a, b; c; z)$  be a Gaussian hypergeometric function. The expectation of  $\cos^2 \theta$  is given by

$$\mathbb{E}[v] = \frac{\alpha + \lambda}{\alpha + \beta + \lambda} \cdot {}_2F_1\left(1, \alpha + 1; \alpha + \beta + 1; \frac{1}{1 + \lambda}\right) \cdot \frac{1}{\alpha + \beta}. \quad (2)$$

*Proof.* Let  $\boldsymbol{\epsilon} \sim \mathcal{N}(\boldsymbol{\mu}, \mathbf{I}_n)$  be a multivariate Gaussian random vector in  $\mathbb{R}^n$ , where  $\boldsymbol{\mu} \in \mathbb{R}^n$  is a fixed non-zero mean vector, and  $\mathbf{I}_n$  is the identity covariance matrix. We are interested in the squared cosine similarity between the random vector  $\boldsymbol{\epsilon}$  and the mean direction  $\boldsymbol{\mu}$ , defined as:

$$v = \cos^2 \theta = \left( \frac{\langle \boldsymbol{\mu}, \boldsymbol{\epsilon} \rangle}{\|\boldsymbol{\mu}\| \cdot \|\boldsymbol{\epsilon}\|} \right)^2. \quad (3)$$

We aim to show that  $v$  follows a non-central Beta distribution and to derive an expression for its expectation. Without loss of generality, by leveraging the rotational invariance of Gaussian distributions, we can assume  $\boldsymbol{\mu} = (\|\boldsymbol{\mu}\|, 0, \dots, 0)^\top$ . Under this coordinate system, we can write the random vector  $\boldsymbol{\epsilon} = \boldsymbol{\mu} + \mathbf{z}$ , where  $\mathbf{z} \sim \mathcal{N}(\mathbf{0}, \mathbf{I}_n)$ . Then:

$$\epsilon_1 = \|\boldsymbol{\mu}\| + z_1, \quad \text{and} \quad \epsilon_i = z_i \text{ for } i \geq 2. \quad (4)$$

The inner product becomes:

$$\langle \boldsymbol{\mu}, \boldsymbol{\epsilon} \rangle = \|\boldsymbol{\mu}\|(\|\boldsymbol{\mu}\| + z_1), \quad (5)$$

and the squared norm:

$$\|\boldsymbol{\epsilon}\|^2 = (\|\boldsymbol{\mu}\| + z_1)^2 + \sum_{i=2}^n z_i^2. \quad (6)$$

Therefore:

$$v = \left( \frac{\|\boldsymbol{\mu}\|(\|\boldsymbol{\mu}\| + z_1)}{\|\boldsymbol{\mu}\| \cdot \sqrt{(\|\boldsymbol{\mu}\| + z_1)^2 + \sum_{i=2}^n z_i^2}} \right)^2 = \frac{(\|\boldsymbol{\mu}\| + z_1)^2}{(\|\boldsymbol{\mu}\| + z_1)^2 + \sum_{i=2}^n z_i^2}. \quad (7)$$

Define  $X = (\|\boldsymbol{\mu}\| + z_1)^2$ , and  $Y = \sum_{i=2}^n z_i^2$ . Then  $X \sim \chi^2(1; \lambda)$ , a non-central chi-squared distribution with 1 degree of freedom and non-centrality parameter  $\lambda = \|\boldsymbol{\mu}\|^2$ , and  $Y \sim \chi^2(n-1)$ , a central chi-squared distribution.

By a known result in the theory of ratio distributions, if  $X \sim \chi^2(k_1; \lambda)$  and  $Y \sim \chi^2(k_2)$  independently, then the ratio

$$\frac{X}{X + Y} \sim \text{Beta}\left(\frac{k_1}{2}, \frac{k_2}{2}; \lambda\right), \quad (8)$$

a non-central Beta distribution. Applying this to our case:

$$v = \frac{X}{X + Y} \sim \text{Beta}\left(\alpha = \frac{1}{2}, \beta = \frac{n-1}{2}; \lambda = \|\boldsymbol{\mu}\|^2\right). \quad (9)$$

The expectation of a non-central Beta random variable  $v \sim \text{Beta}(\alpha, \beta; \lambda)$  is given by the known analytical form involving a Gauss hypergeometric function (please refer to NIST Digital Library of Mathematical Functions ):

$$\mathbb{E}[v] = \frac{\alpha + \lambda}{\alpha + \beta + \lambda} \cdot {}_2F_1 \left( 1, \alpha + 1; \alpha + \beta + 1; \frac{1}{1 + \lambda} \right) \cdot \frac{1}{\alpha + \beta}. \quad (10)$$

Substituting the parameters  $\alpha = \frac{1}{2}$ ,  $\beta = \frac{n-1}{2}$ , and  $\lambda = \|\boldsymbol{\mu}\|^2$ , we obtain the expression claimed in the theorem.

$$\mathbb{E}[\cos^2 \theta] = \mathbb{E}[v] = \frac{\frac{1}{2} + \lambda}{\frac{n}{2} + \lambda} \cdot {}_2F_1 \left( 1, \frac{3}{2}; \frac{n+2}{2}; \frac{1}{1 + \lambda} \right) \cdot \frac{1}{\frac{n}{2}}. \quad (11)$$

□

**Theorem 2.** *Under the setup described above, let  $\{v_i\}_{i=1}^K$  be  $K$  samples drawn from the non-central beta distribution  $\text{Beta}(\alpha, \beta; \lambda)$ . When  $n$  is moderately large and  $K$  is not too small, the typical maximum  $\nu_{C_n^K}$  is approximately the same:*

$$\nu_{C_n^K} \approx \frac{2 \log K}{n} \quad (12)$$

*Proof.* Let  $\boldsymbol{\mu} \in \mathbb{R}^n$  be a fixed mean vector, and let  $\boldsymbol{\epsilon} \sim \mathcal{N}(\boldsymbol{\mu}, \mathbf{I})$  be a sample from an isotropic Gaussian centered at  $\boldsymbol{\mu}$ . Denote the angle  $\theta$  between  $\boldsymbol{\epsilon}$  and  $\boldsymbol{\mu}$ , and define  $v = \cos^2 \theta$ . It is known that:

$$v = \left( \frac{\langle \boldsymbol{\epsilon}, \boldsymbol{\mu} \rangle}{\|\boldsymbol{\epsilon}\| \cdot \|\boldsymbol{\mu}\|} \right)^2. \quad (13)$$

The random variable  $v \in [0, 1]$  describes the squared alignment between the Gaussian sample and the mean vector. Let  $v_1, \dots, v_K$  be  $K$  independent samples of  $v$ , and let  $\nu_{C_n^K} := \max_{1 \leq i \leq K} v_i$  be their maximum. We aim to derive an approximation of  $\nu_{C_n^K}$  when  $n$  is moderately large and  $K$  is not too small.

**Step 1: Geometric Decomposition:** We begin by analyzing the structure of  $v$ . Write each sample  $\boldsymbol{\epsilon} \sim \mathcal{N}(\boldsymbol{\mu}, \mathbf{I})$  as:

$$\boldsymbol{\epsilon} = \boldsymbol{\mu} + \mathbf{z}, \quad \text{where } \mathbf{z} \sim \mathcal{N}(\mathbf{0}, \mathbf{I}). \quad (14)$$

Then the inner product is:

$$\langle \boldsymbol{\epsilon}, \boldsymbol{\mu} \rangle = \|\boldsymbol{\mu}\|^2 + \langle \mathbf{z}, \boldsymbol{\mu} \rangle, \quad (15)$$

and the norm is:

$$\|\boldsymbol{\epsilon}\|^2 = \|\boldsymbol{\mu}\|^2 + 2\langle \mathbf{z}, \boldsymbol{\mu} \rangle + \|\mathbf{z}\|^2. \quad (16)$$

Substituting into  $v = \cos^2 \theta$ , we have:

$$v = \left( \frac{\|\boldsymbol{\mu}\|^2 + \langle \mathbf{z}, \boldsymbol{\mu} \rangle}{\|\boldsymbol{\mu}\| \cdot \sqrt{\|\boldsymbol{\mu}\|^2 + 2\langle \mathbf{z}, \boldsymbol{\mu} \rangle + \|\mathbf{z}\|^2}} \right)^2. \quad (17)$$

Define  $\lambda := \|\boldsymbol{\mu}\|^2$ , and note:

- $\langle \mathbf{z}, \boldsymbol{\mu} \rangle \sim \mathcal{N}(0, \lambda)$ , since  $\mathbf{z} \sim \mathcal{N}(\mathbf{0}, \mathbf{I})$  and  $\boldsymbol{\mu}$  is fixed.
- $\|\mathbf{z}\|^2 \sim \chi^2(n)$ , the chi-squared distribution with  $n$  degrees of freedom.

This yields a complicated expression for  $v$ , but its key properties can be inferred through asymptotic concentration when  $n$  is large.

**Step 2: Asymptotic Behavior in High Dimensions:** In high-dimensional spaces, random vectors drawn from  $\mathcal{N}(\boldsymbol{\mu}, I)$  are almost orthogonal to any fixed vector not aligned with the coordinate axes. More precisely:

- The norm  $\|\mathbf{z}\|^2 \sim \chi^2(n)$  concentrates around  $n$  with high probability.
- The inner product  $\langle \mathbf{z}, \boldsymbol{\mu} \rangle \sim \mathcal{N}(0, \lambda)$  has sub-Gaussian tails.
- Therefore, the numerator of  $v$ , which includes  $\langle \mathbf{z}, \boldsymbol{\mu} \rangle$ , varies on the order of  $\sqrt{\lambda}$ , while the denominator is dominated by  $\sqrt{\lambda + n}$ .

Combining these facts, we estimate:

$$v \approx \left( \frac{\lambda + \mathcal{O}(\sqrt{\lambda})}{\sqrt{\lambda} \cdot \sqrt{\lambda + n + \mathcal{O}(\sqrt{n})}} \right)^2 \approx \mathcal{O}\left(\frac{1}{n}\right), \quad (18)$$

suggesting that a typical value of  $v$  is small, on the order of  $\frac{1}{n}$ , as dimension grows.

**Step 3: Distribution of the Maximum:** Let  $\nu_{\mathcal{C}^K} = \max_{i=1}^K v_i$ . To estimate the typical value of this maximum, we use a probabilistic argument. Assume  $v$  has a cumulative distribution function  $F(t) := \mathbb{P}(v \leq t)$ . Then:

$$\mathbb{P}(\nu_{\mathcal{C}_n^K} \leq t) = F(t)^K, \quad (19)$$

and thus:

$$\mathbb{P}(\nu_{\mathcal{C}_n^K} \geq t) = 1 - F(t)^K. \quad (20)$$

To estimate the typical maximum, we set this probability to 0.5 and solve for  $t$ :

$$F(t)^K = 1/2 \quad \Rightarrow \quad \log F(t) = -\frac{\log 2}{K}. \quad (21)$$

Suppose  $v \sim \text{Beta}(\frac{1}{2}, \frac{n-1}{2}; \lambda)$ , then for small  $t$ , the distribution behaves approximately like a central Beta distribution. The density is approximately:

$$f(t) \propto t^{\alpha-1}(1-t)^{\beta-1} \approx t^{-1/2} \quad \text{for small } t, \quad (22)$$

and thus the CDF behaves like  $F(t) \approx c \cdot \sqrt{t}$ , for some constant  $c > 0$  depending weakly on  $\lambda$ . Then:

$$F(t)^K \approx (c \cdot \sqrt{t})^K = c^K \cdot t^{K/2}. \quad (23)$$

Set this equal to 1/2:

$$c^K \cdot t^{K/2} = \frac{1}{2} \quad \Rightarrow \quad t^{K/2} = \frac{1}{2c^K} \quad \Rightarrow \quad \log t = -\frac{2}{K} \log(2c^K) = -\frac{2 \log K}{K} + \mathcal{O}\left(\frac{1}{K}\right), \quad (24)$$

which yields:

$$t \approx \exp\left(-\frac{2 \log K}{K}\right) \approx 1 - \frac{2 \log K}{K}, \quad \text{if } K \gg 1. \quad (25)$$

However, since we are dealing with small values of  $v$ , we take a simpler approach using exponential tail bounds. For  $v \sim \text{Beta}(\frac{1}{2}, \frac{n-1}{2}; \lambda)$ , it can be shown directly from the geometry of Gaussian vectors that:

$$\mathbb{P}(v > t) \approx \exp(-\frac{n}{2}t), \quad \text{for large } t. \quad (26)$$

Therefore, the probability that none of the  $K$  samples exceeds  $t$  is:

$$\mathbb{P}(\nu_{\mathcal{C}_n^K} \leq t) \approx (1 - \exp(-\frac{n}{2}t))^K. \quad (27)$$

Set this equal to 1/2:

$$(1 - \exp(-\frac{n}{2}t))^K = \frac{1}{2} \quad \Rightarrow \quad \exp(-\frac{n}{2}t) = \frac{1}{K}, \quad \text{hence } t = \frac{2 \log K}{n}. \quad (28)$$

**Conclusion:** We have shown that the maximum squared cosine similarity among  $K$  independent samples  $v_i \sim \text{Beta}(\frac{1}{2}, \frac{n-1}{2}; \lambda)$  satisfies:

$$\nu_{\mathcal{C}_n^K} \approx \frac{2 \log K}{n}, \quad (29)$$

as  $n \rightarrow \infty$  and  $K$  remains polynomial in  $n$ . This approximation arises from the geometry of high-dimensional Gaussians and a sharp estimate of the upper tail of the non-central beta distribution.

□

## 2 More Visualization Results



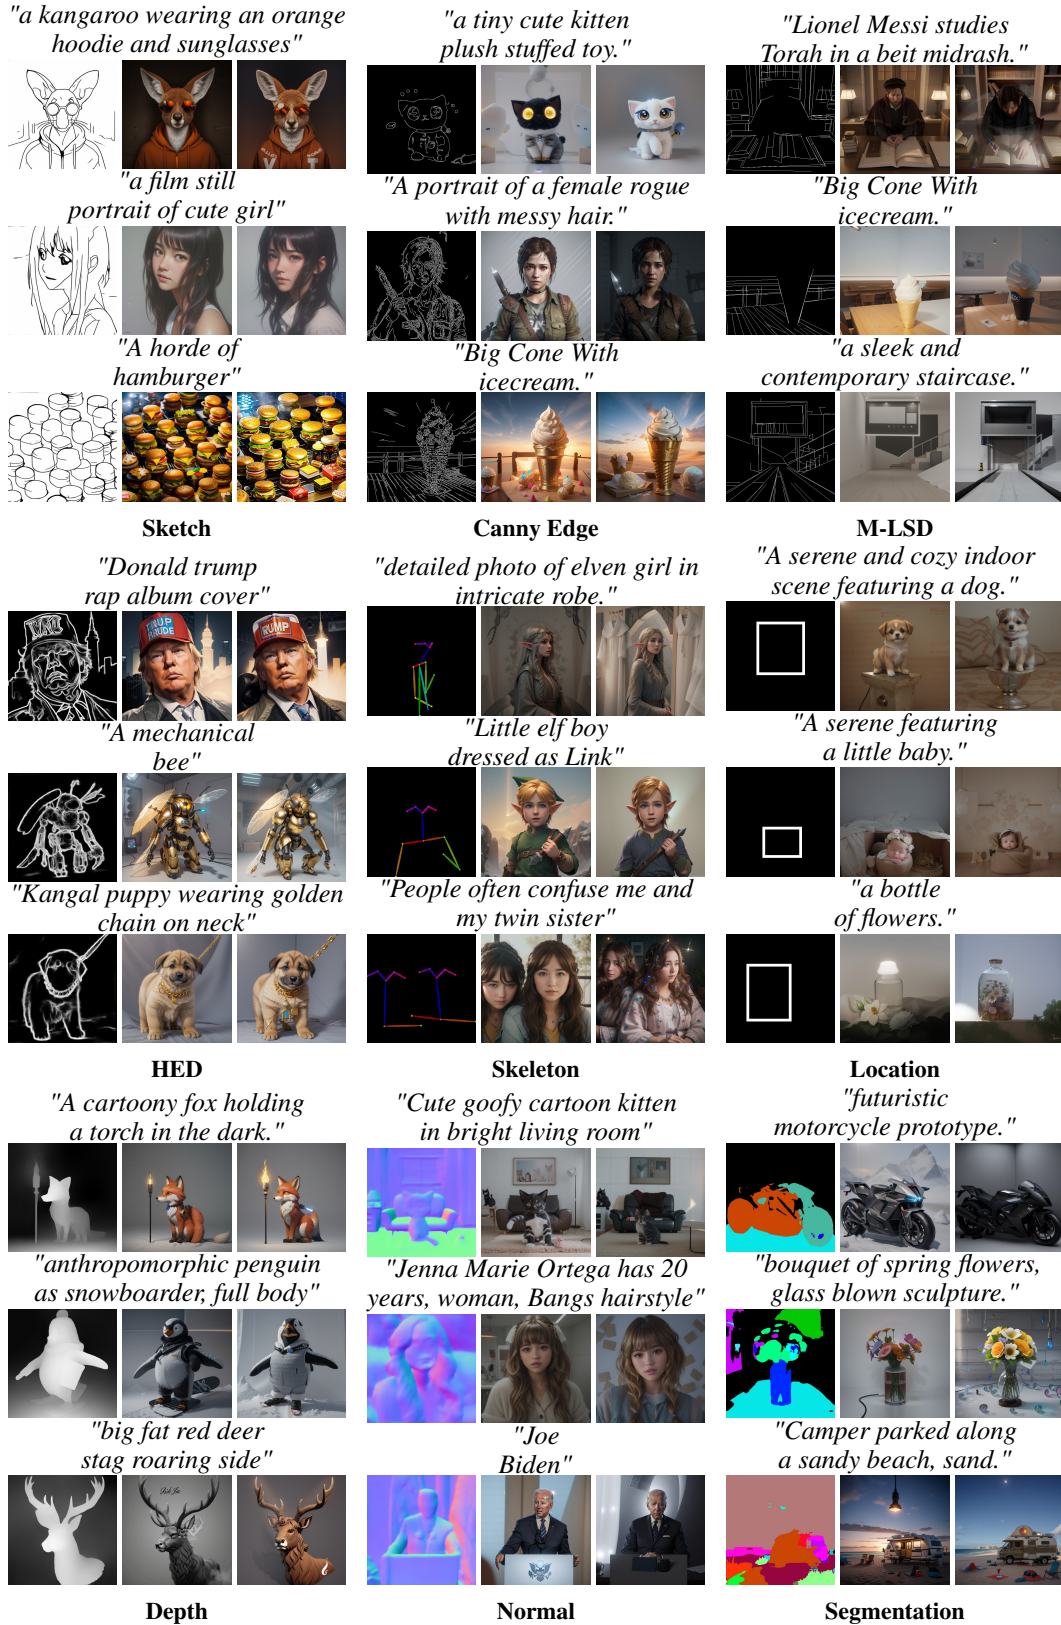

Figure 1: Conditional Generation with Diverse Conditions via Discrete Noise. Discrete noise enables seamless integration of various conditions into diffusion models. To demonstrate its versatility, we showcase ten diverse applications: Sketch, Canny Edge, MLSD, HED, Skeleton, Location, Depth, Normal, and Segmentation.

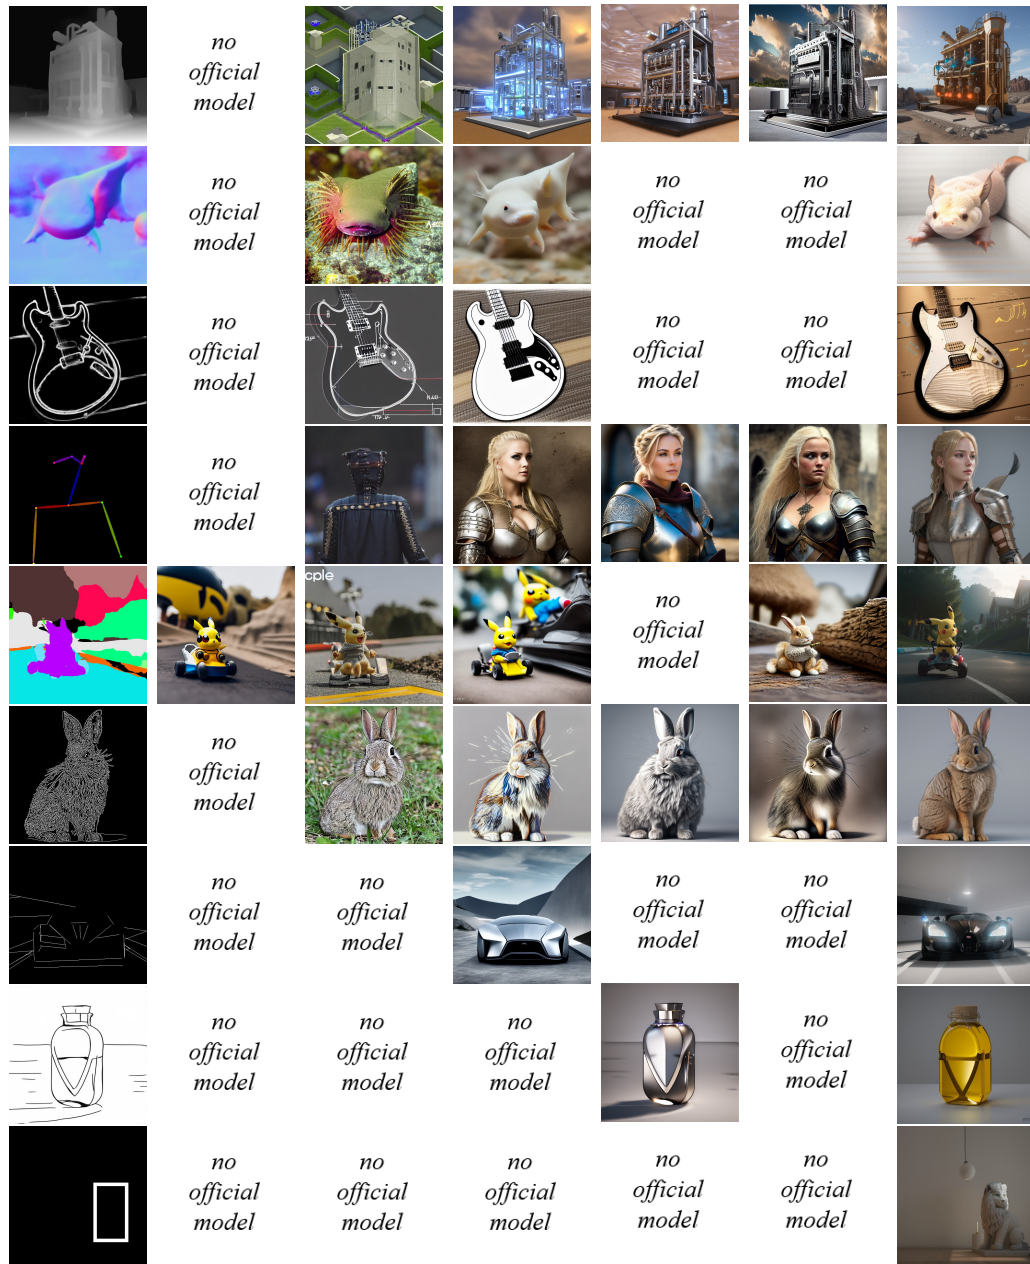

**Condition      UGD      FreeCtrl      ControlNet      T2I-Adapter      AnyControl      Ours**

Figure 2: Qualitative Comparison for Controllable Generation under Different Conditions: We compare our method with five other approaches. Among them, UGD and FreeCtrl belong to the classifier-based guidance category, while ControlNet, T2I-Adapter, and AnyControl are part of the classifier-free guidance category. The results demonstrate that our method is competitive with state-of-the-art techniques.



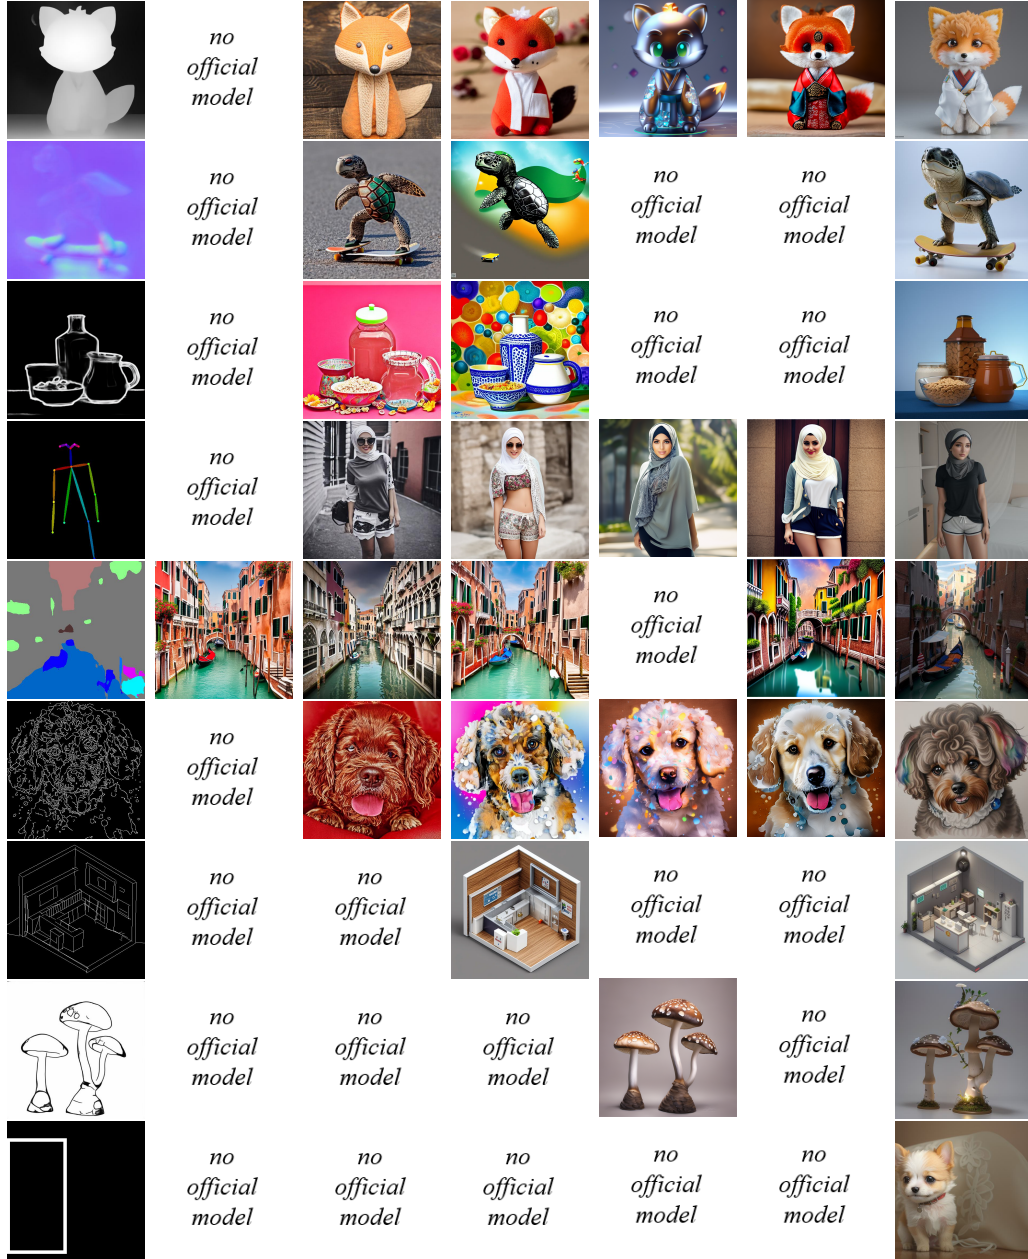

**Condition      UGD      FreeCtrl      ControlNet      T2I-Adapter      AnyControl      Ours**

Figure 3: Qualitative Comparison for Controllable Generation under Different Conditions: We compare our method with five other approaches. Among them, UGD and FreeCtrl belong to the classifier-based guidance category, while ControlNet, T2I-Adapter, and AnyControl are part of the classifier-free guidance category. The results demonstrate that our method is competitive with state-of-the-art techniques.
